# Supplementary material
Source: publisher figshare collection journal article supplement (https://karger.figshare.com/ndownloader/files/23726243)
Supplement: Supplementary file 1 [file 23726243]

**Appendix. International Fetal Cardiac Intervention Registry Participants by Country/Center**

| Argentina | Hospital Italiano de Buenos Aires | Sofía Grinenco, Pablo Marantz, Lucas Otaño |
| --- | --- | --- |
| Australia | Royal Hospital for Women | Dan Challis, Gary Sholler |
| Austria | Children’s Heart Center Linz | Wolfgang Arzt, Gerald Tulzer |
| Belgium | University Hospitals Leuven | Roland Devlieger |
| Brazil | Hospital do Coração | Carlos Pedra, Simone Pedra, Fabio Peralta |
| Brazil |  | Lilian Lopes |
| Canada | The Hospital for Sick Children | Edgar Jaeggi |
|  | Mount Sinai Hospital, University of Toronto | Greg Ryan |
| France | Necker Hospital For Sick Children | Younes Boudjemline, Guiti Milani |
|  | **Centre Medico-Chirurgical et Obstetrical** | Romain Favre |
| Germany | **Center for Gynecology and Obstetrics** | Thomas Kohl |
|  | German Heart Center | Renate Oberhoffer, Annette Wacker-Gußmann |
|  | University of Bonn | Christoph Berg, Ulrich Gembruch, Ulrike Herberg |
|  | University of Dusseldorf | Klaus Schmidt |
| Mexico | Women and Children’s Specialty Hospital of Queretaro | Monica Cruz-Lemini |
| The Netherlands | Academic Medical Center | Sally Clur |
|  | Leiden University Medical Center | Nico Blom, Monique Haak, Dick Oepkes |
| Poland | Medical University of Warsaw | Joanna Dangel |
| Portugal | Hospital São João/Porto Medical School | Jose Areias, Joana Miranda |
| Spain | A Coruña University Hospital | Carolina Blanco Rodríguez |
|  | **Autonomous University of Barcelona** | Queralt Ferrer |
|  | Hospital Universitario 12 de Octubre | Alberto Galindo |
| Sweden | The Queen Silvia Children's Hospital | Mats Mellander |
| Switzerland |  | Gerard Bark |
| United Kingdom | Evelina Children's Hospital | Owen Miller, Gurleen Sharland, John Simpson, Trisha Vigneswaran |
|  | University of Birmingham | Mark Kilby |
|  | St George's University of London | Asma Khalil |
| United States | All Children's Hospital | James Huhta |
|  | Boston Children's Hospital | Terra LaFranchi, Wayne Tworetzky, Audrey Marshall |
|  | Brigham and Women’s Hospital | Louise Wilkins-Haug |
|  | Children's Hospital Colorado | Tim Crombleholme, Bettina Cuneo |
|  | The Children's Hospital of Philadelphia | Lori Howell, Mark Johnson, Jack Rychik |
|  | Children's Hospital of Wisconsin | Michele Frommelt, Mike Mitchell |
|  | Cincinnati Children's Hospital Medical Center | Allison Divanovic, Mounira Habli |
|  | C.S. Mott Children's Hospital | Sarah Gelehrter, Carlen Gomez-Fifer, Cosmas Van den Ven, Suzanne Welch |
|  | Florida International University? | Eftichia Kontopoulos, Ruben Quintero |
|  | Johns Hopkins Center for Fetal Therapy | Ahmet Baschat |
|  | Magee-Womens Hospital of the University of Pittsburgh | Stephen Emery |
|  | Nationwide Children’s Hospital | Aimee Armstrong, JoAnn Davis, Karen Texter |
|  | SSM Cardinal Glennon Children’s Medical Center | Katie Francis, Julie Moyer, Renuka Peterson, Laura Raineri, Emanuel Vlastos |
|  | Stanford University/Lucille Packard Children's Hospital | Theresa Tacy |
|  | Texas Children's, Baylor College of Medicine | Carolyn Altman, Nancy Ayres, Michael Belfort, Shaine Morris, Daniel Penny |
|  | UH Rainbow Babies and Children's Hospital | Tiffanie McCourt, James Strainic |
|  | University of California, San Francisco | Whitnee Hogan, Anita J Moon-Grady |
|  | University of Southern California/Children's Hospital Los Angeles | Ramen Chmait, Jay Pruetz |
|  | University of Texas, Houston | Helena Gardiner |
